# Supplementary material for: Comparative genomic analyses of the human fungal pathogens Coccidioides and their relatives
Source: HighWire-hosted journal article supplement (doi:10.1101/gr.087551.108), 2009-08-28

## Supplemental Information File 15: Graphical representation of the *Coccidioides immitis* genome

Various characteristics of the *Coccidioides* genomes are represented in the following plots. Because of its high-quality assembly, the *C. immitis* RS genome was chosen to represent *Coccidioides*. Each chromosome's data is listed independently, and in each plot the x-axis represents the chromosome position in Mb. The y-axis varies as a function of the data captured (see plot titles for clarification). In the plots of syntenic conservation, violet colored regions represent conserved synteny, dark purple regions represent inversions, and white regions represent the absence of detectable homology. The remaining histograms of genes per 50kb, repetitive elements per 50kb, orthologs per genes per 50kb, the number of orphans per genes per 50kb, the number of *C. immitis* specific genes per total genes per 50kb and the number of *Coccidioides* specific genes (present in and unique to both species) per total genes per 50kb were generated via a sliding window analysis of the data described in the Results.

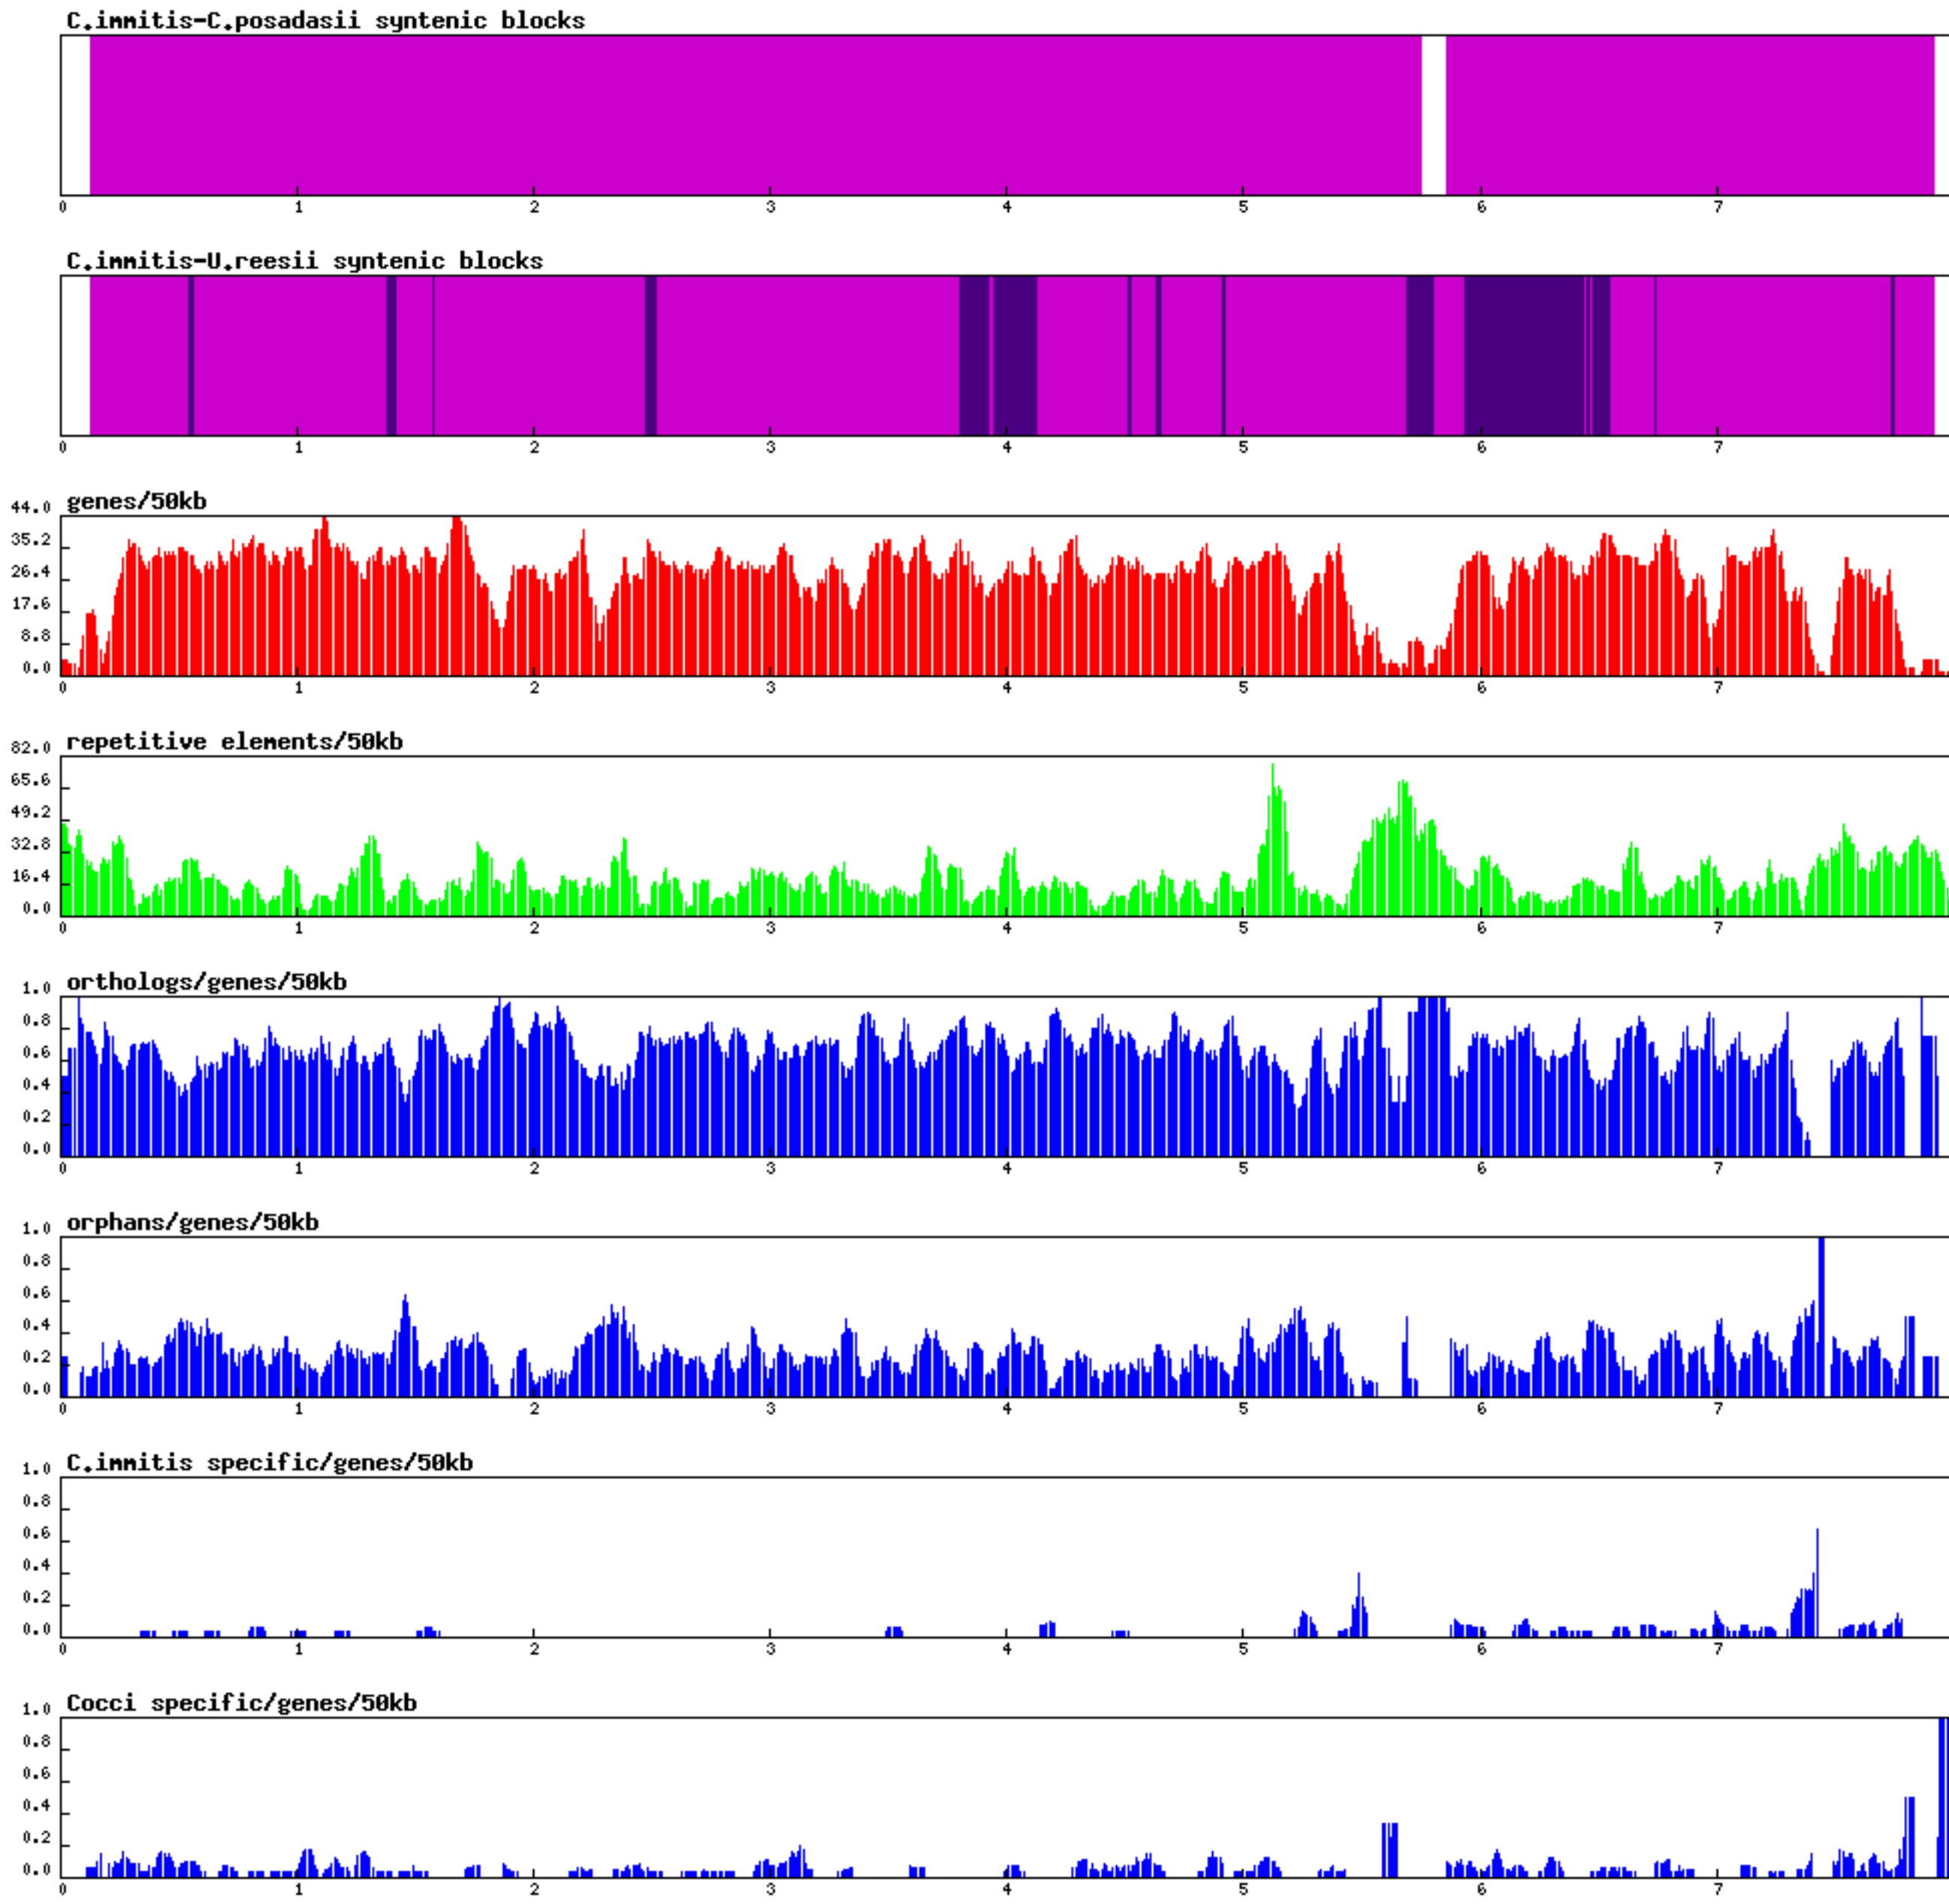

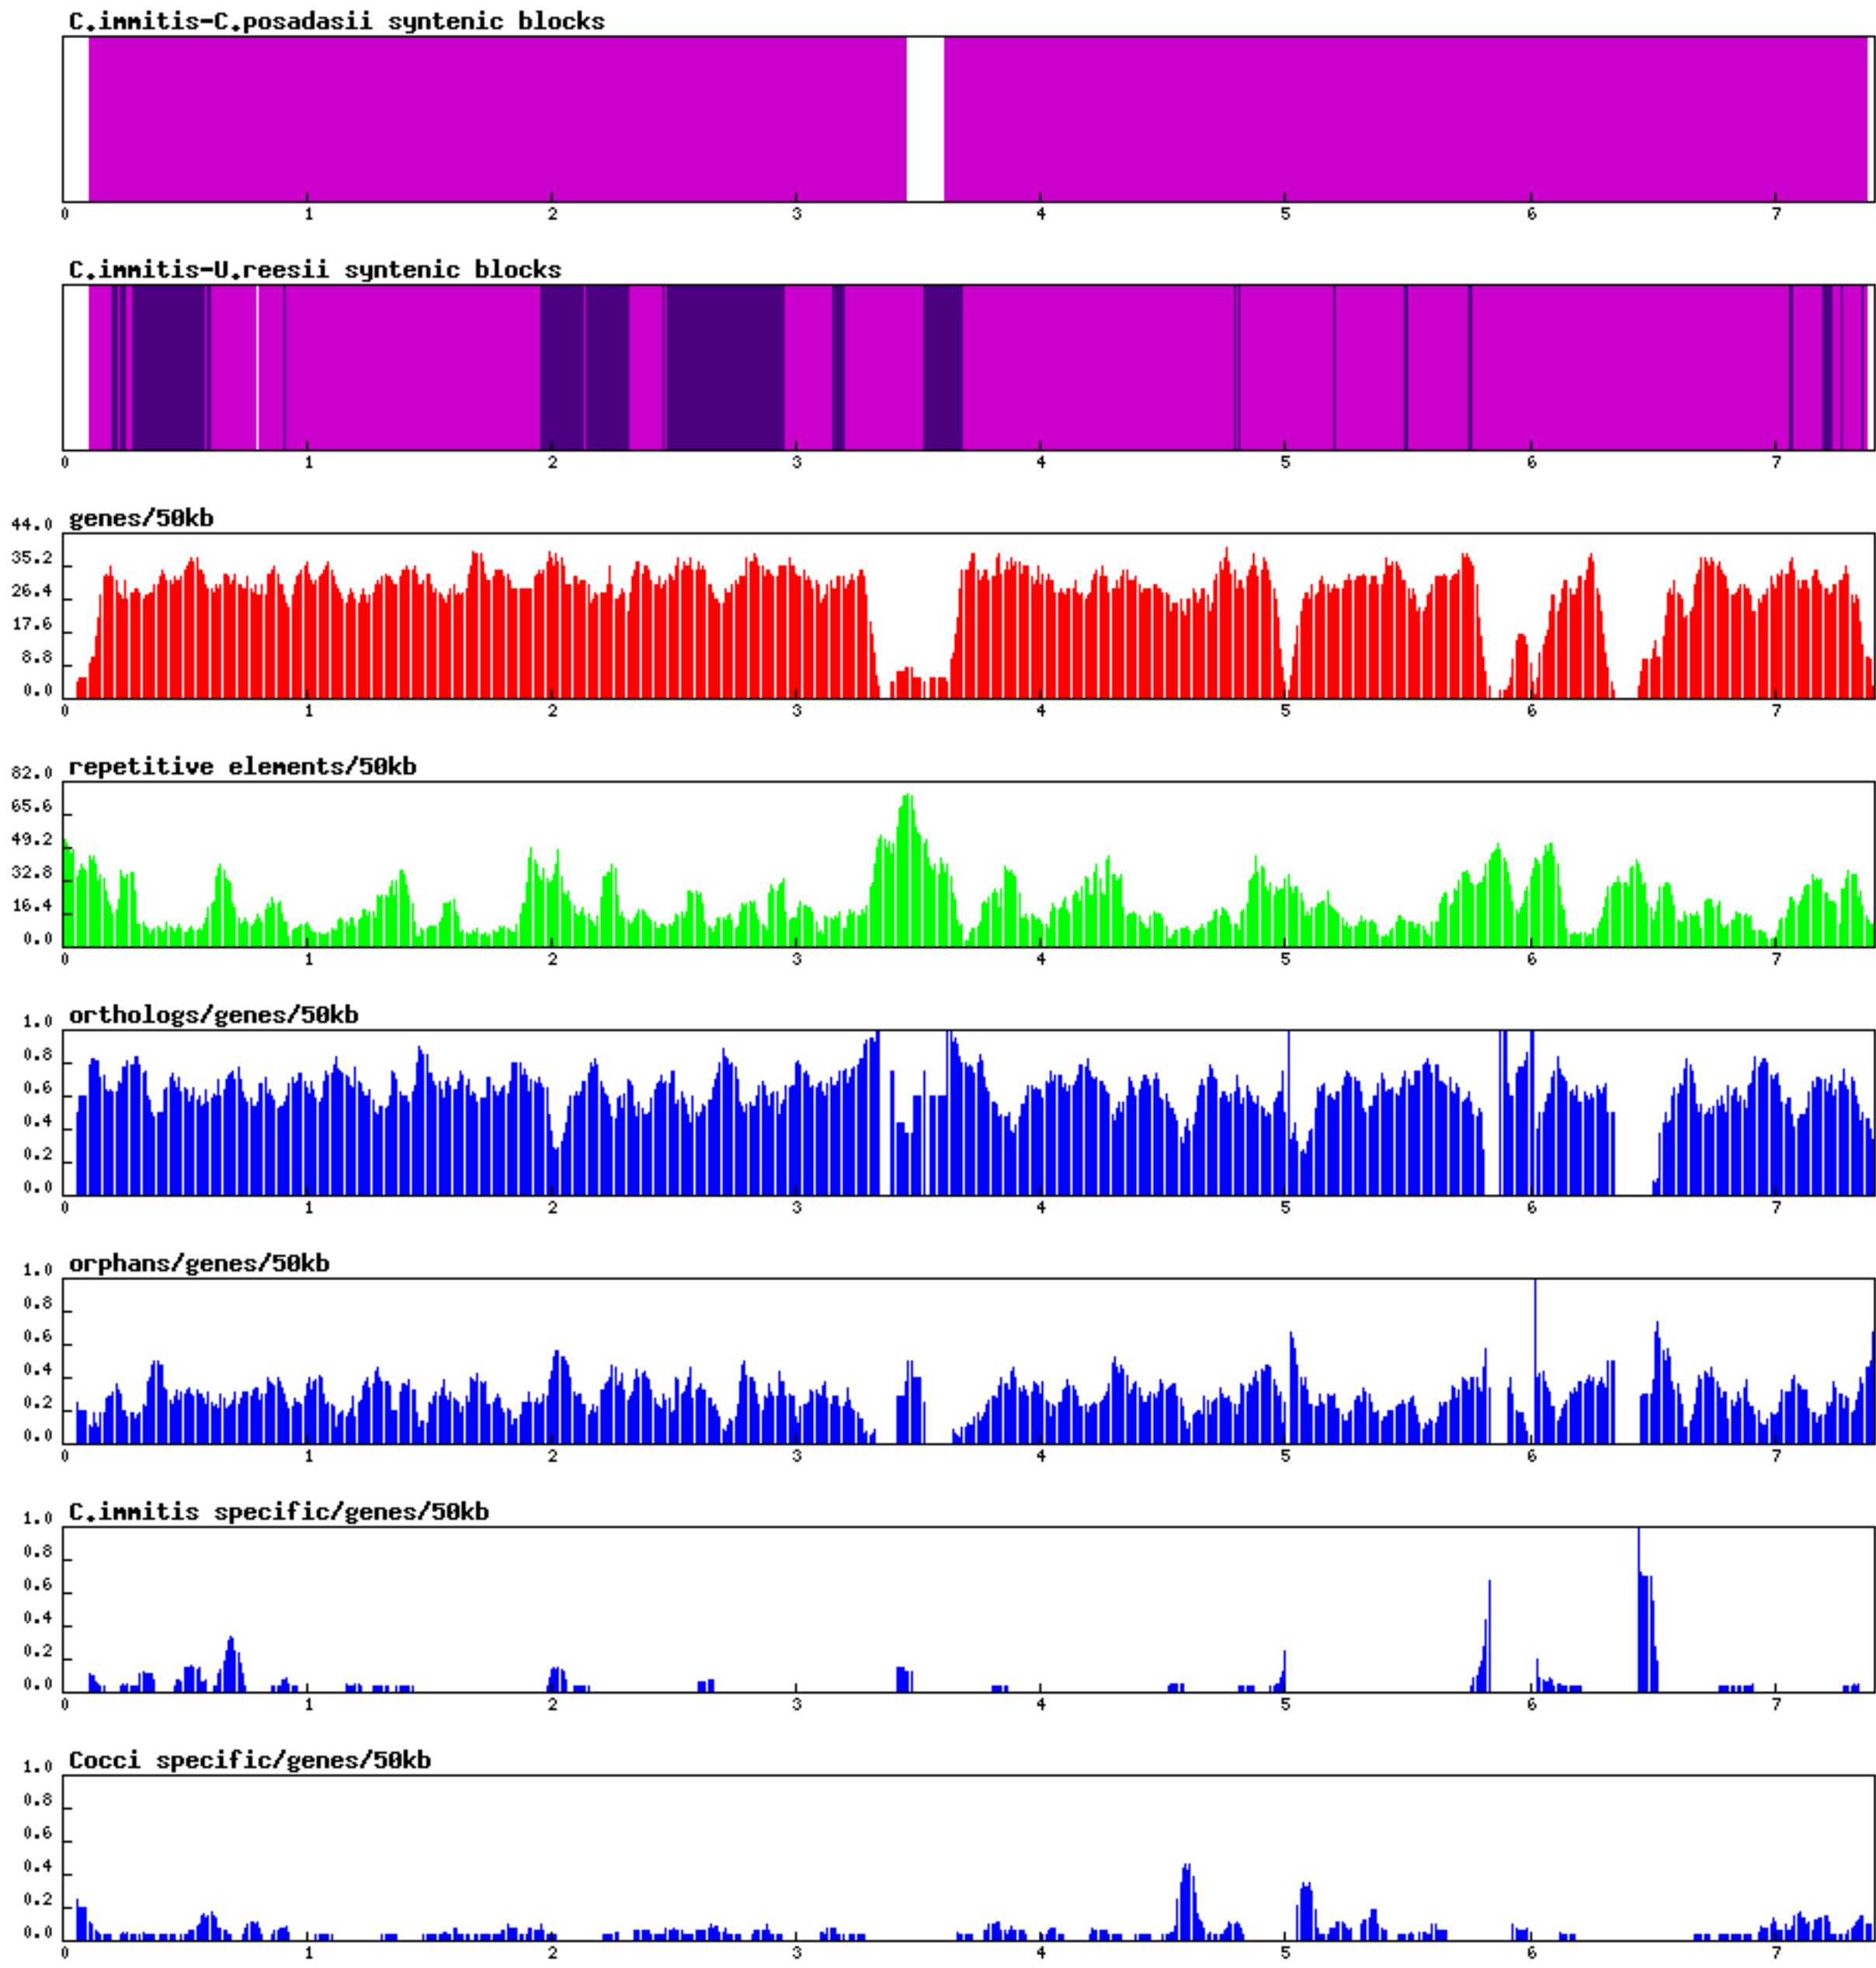

C.innitis-C.posadasii syntenic blocks

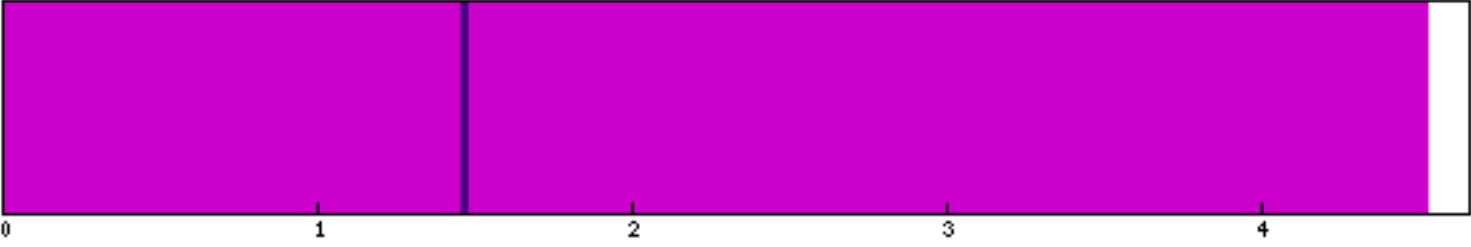

C.innitis-U.reesii syntenic blocks

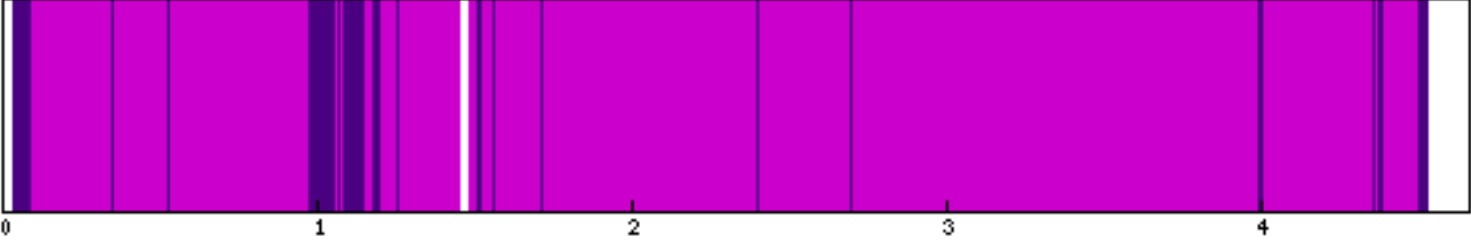

genes/50kb

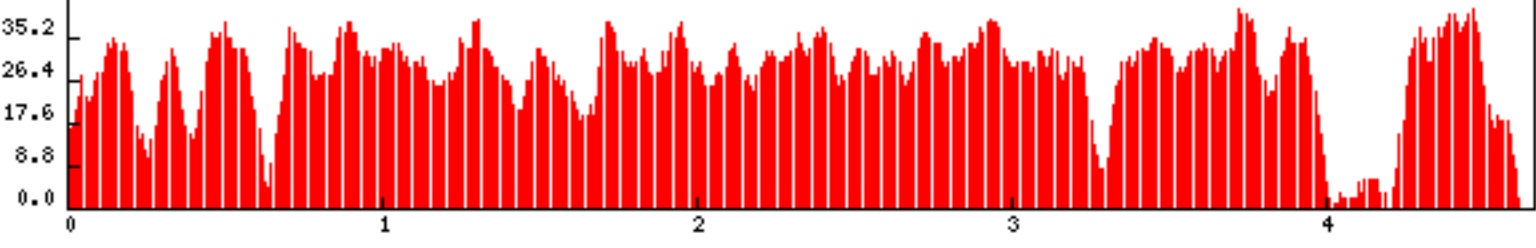

repetitive elements/50kb

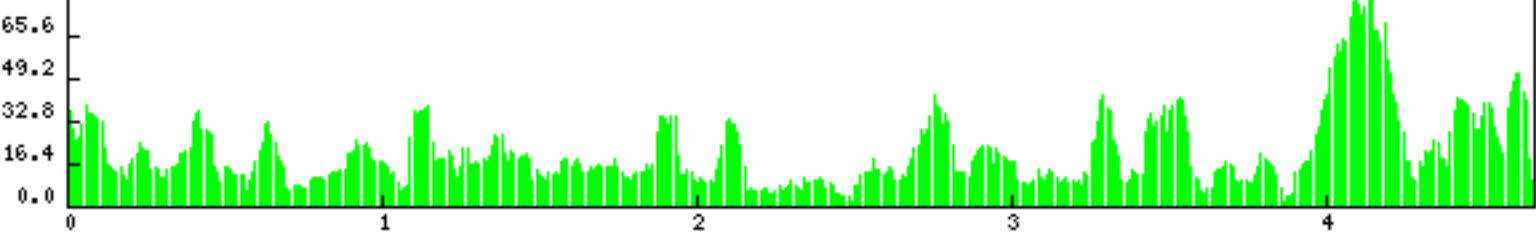

orthologs/genes/50kb

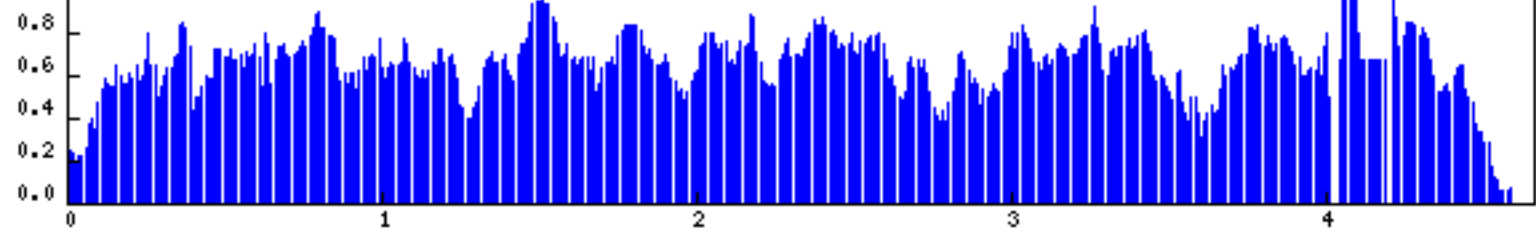

orphans/genes/50kb

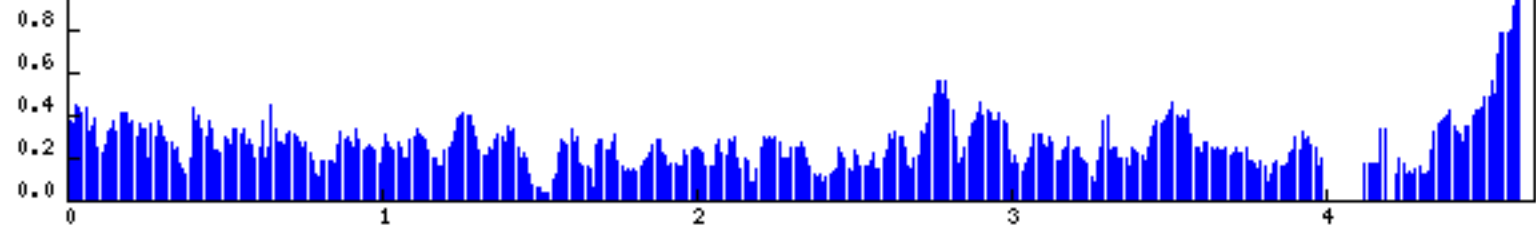

C.innitis specific/genes/50kb

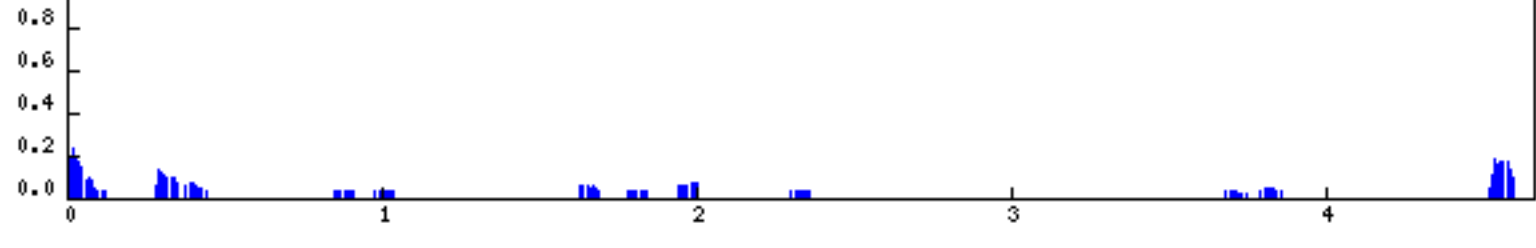

Cocci specific/genes/50kb

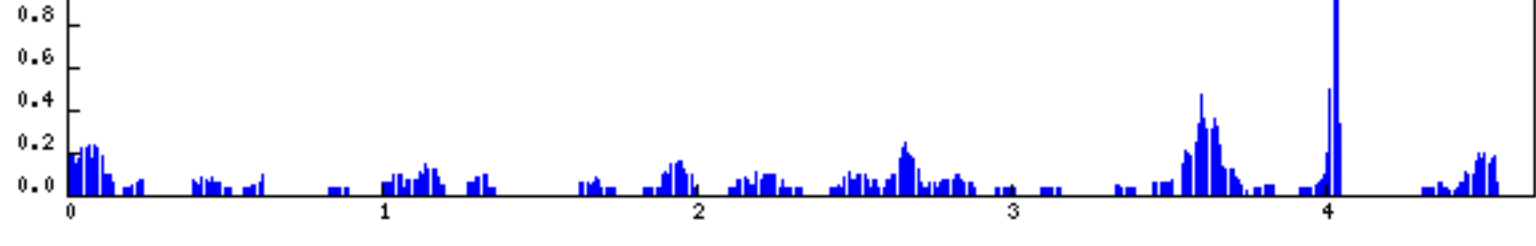

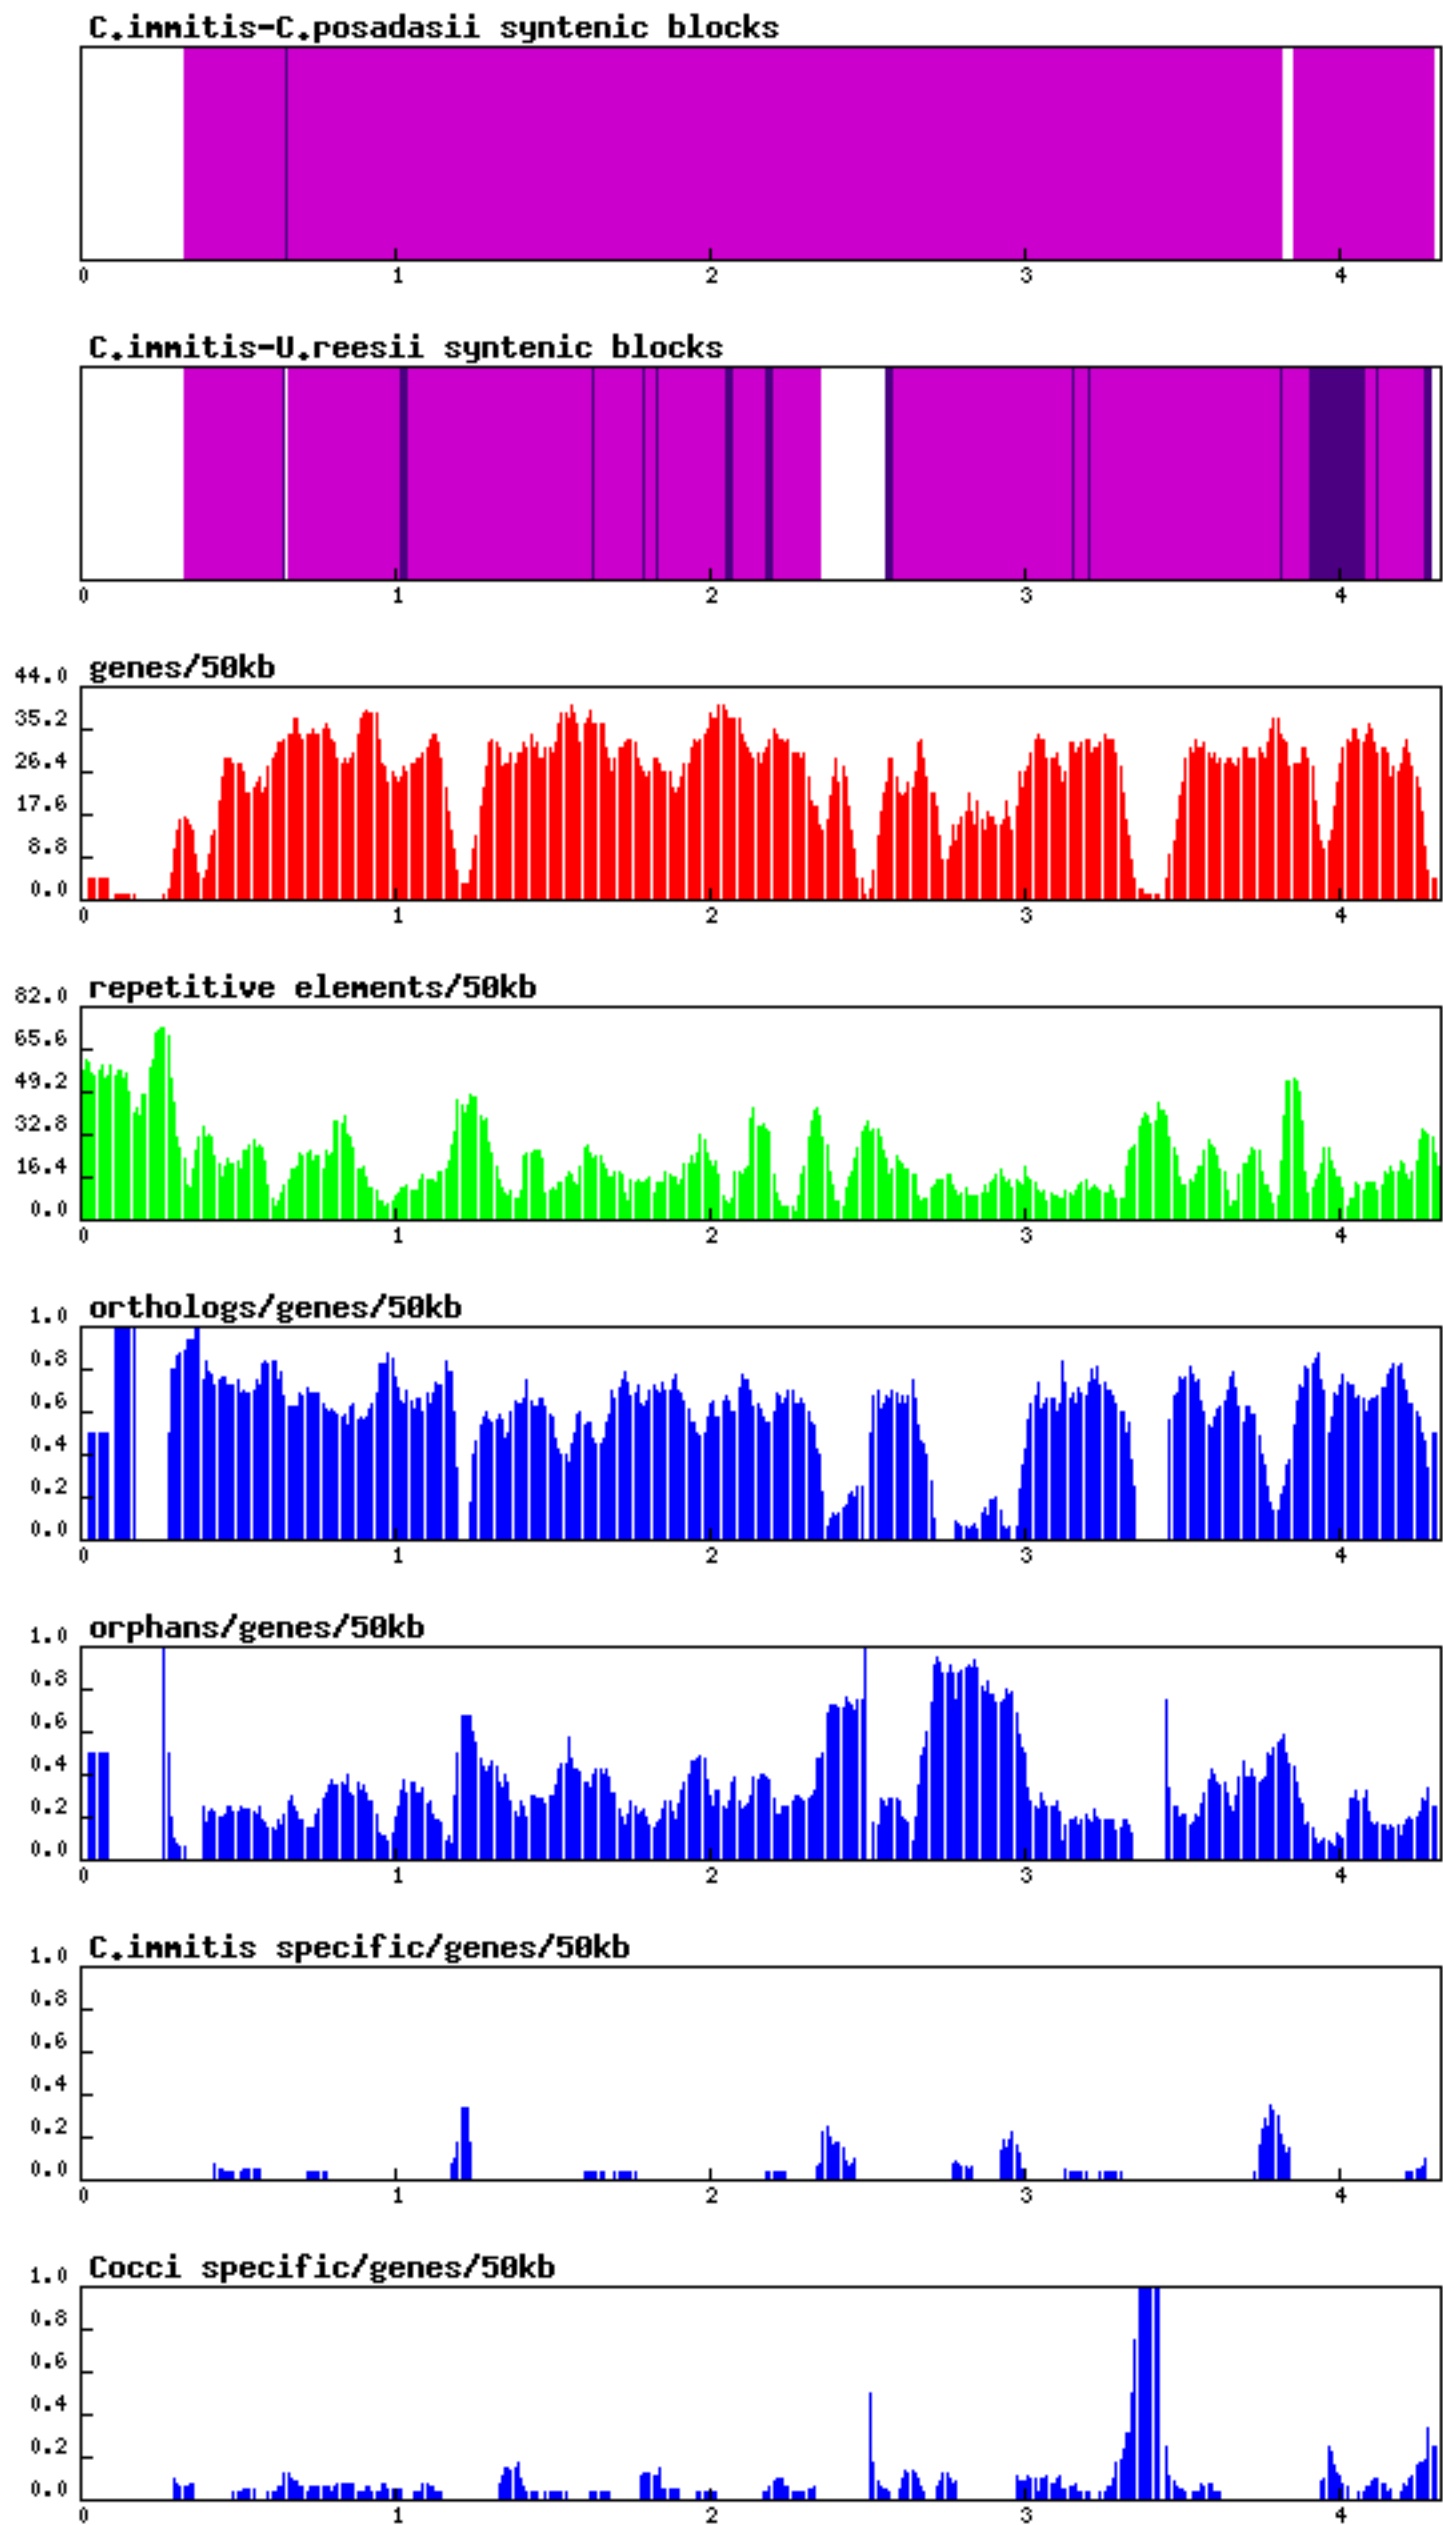

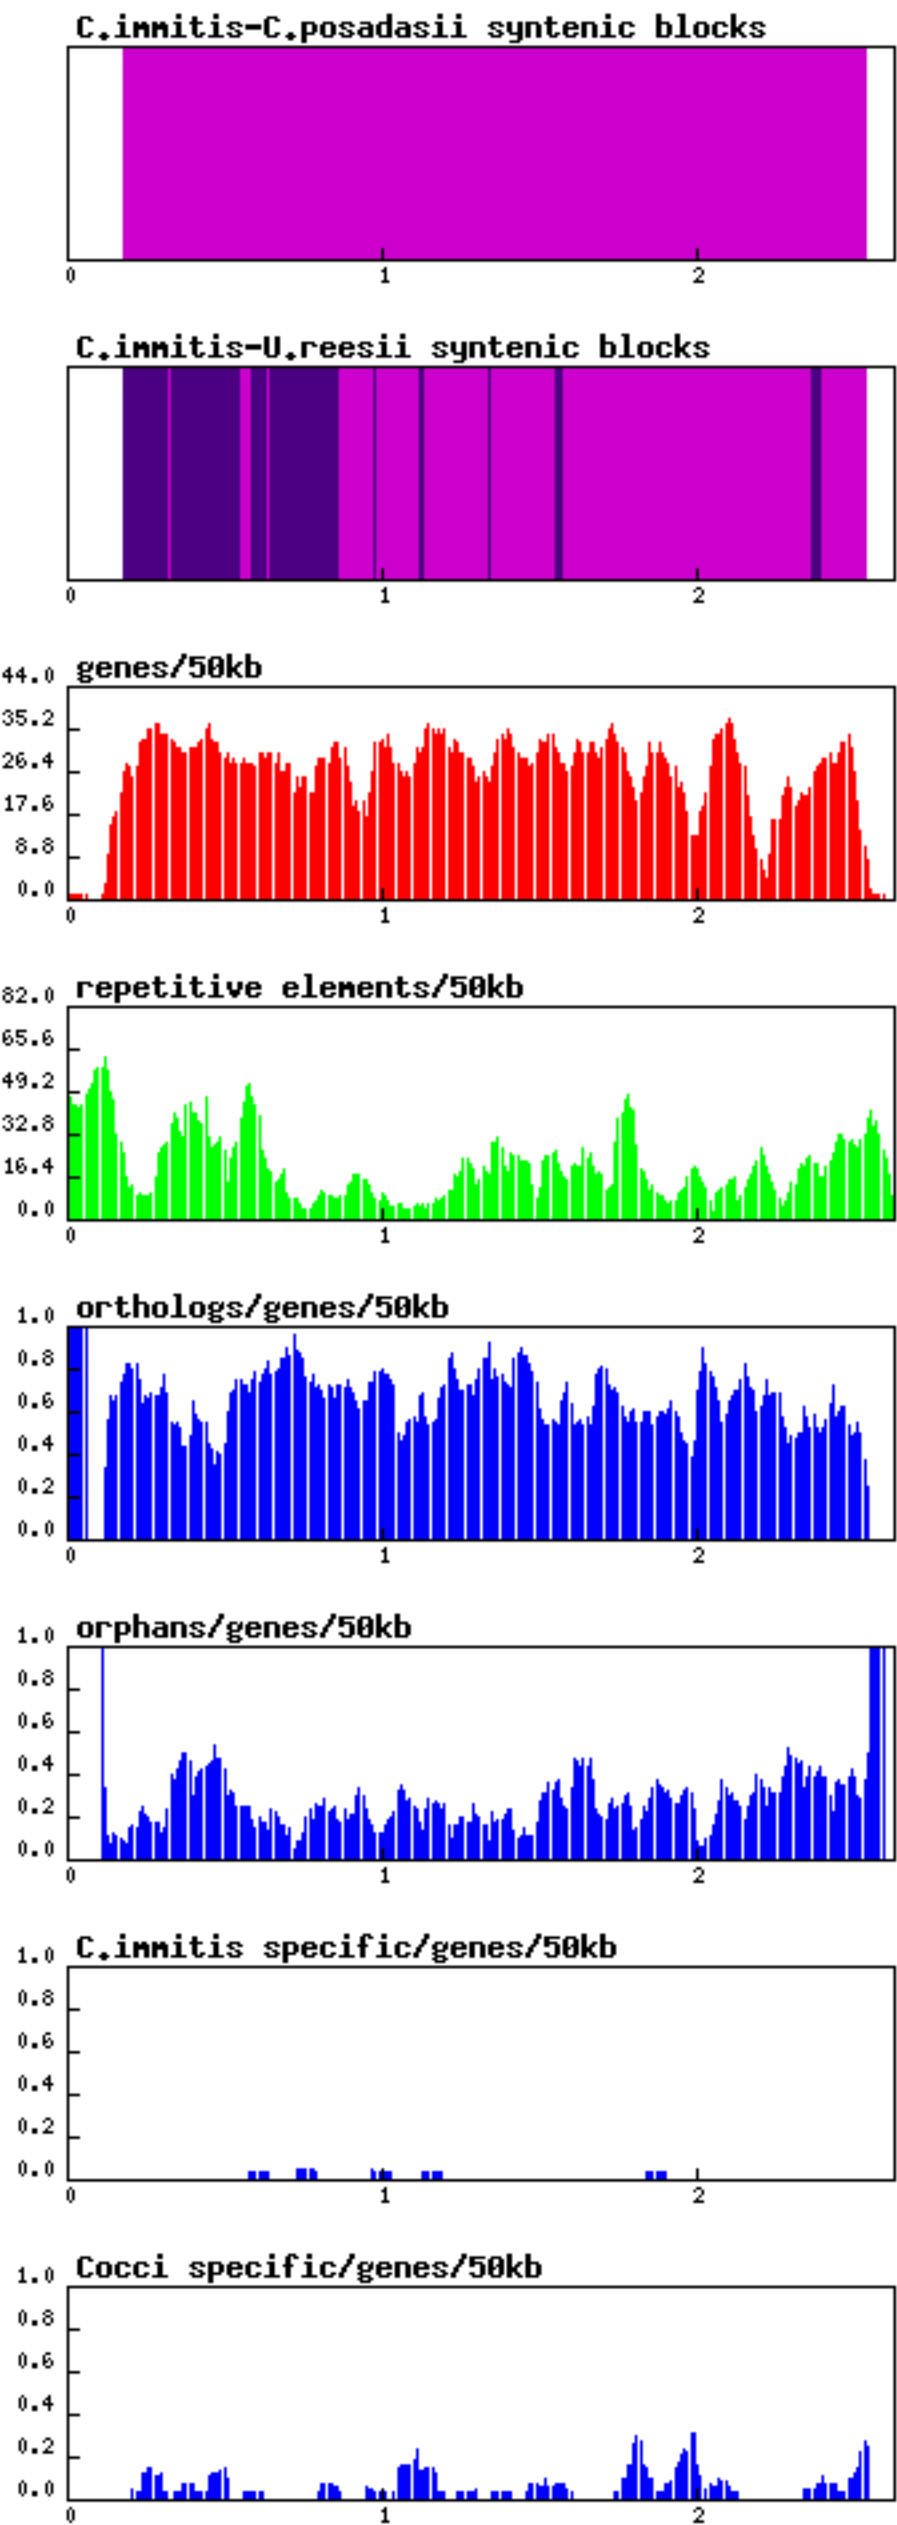

C.innitis-C.posadasii syntenic blocks

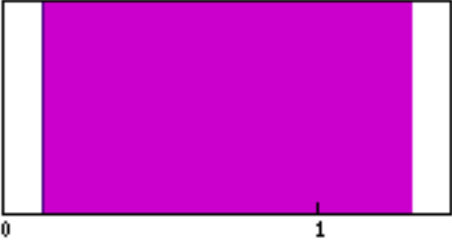

C.innitis-U.reesii syntenic blocks

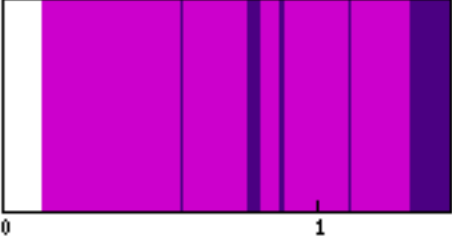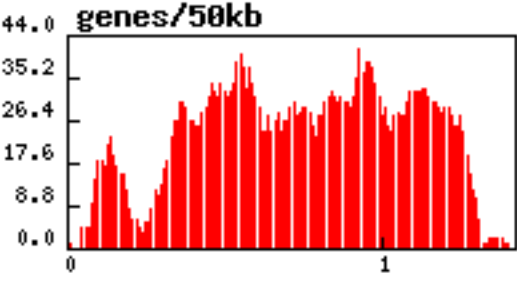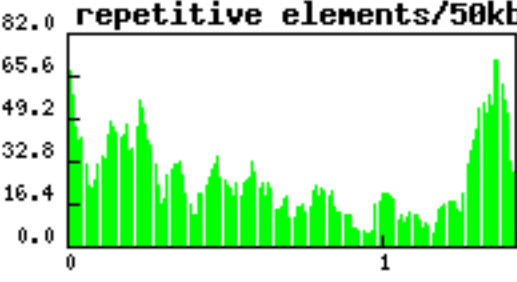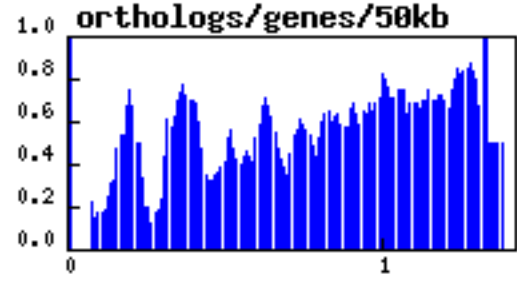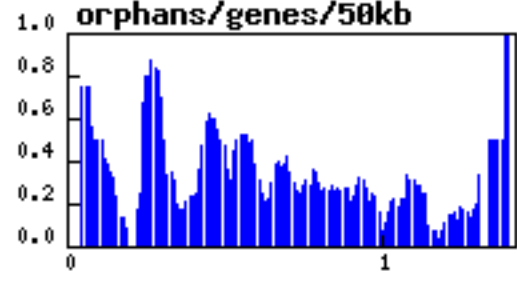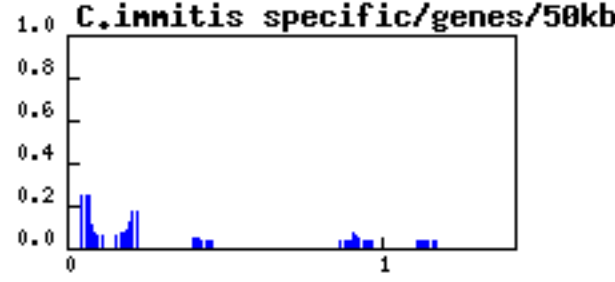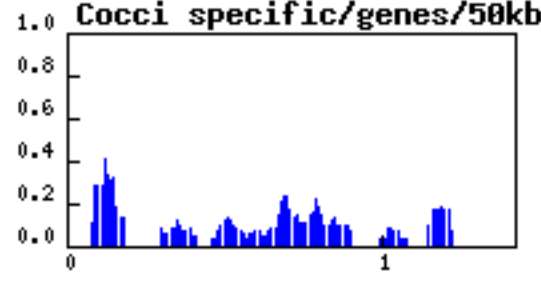

cimm\_2.7

C.innitis-C.posadasii syntenic blocks

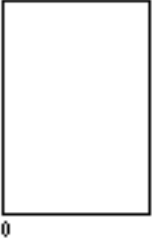

C.innitis-U.reesii syntenic blocks

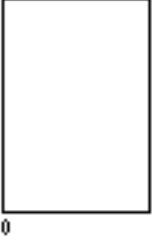

genes/50kb

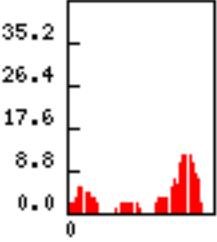

repetitive elements/50kb

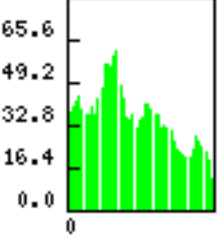

orthologs/genes/50kb

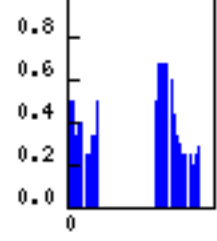

orphans/genes/50kb

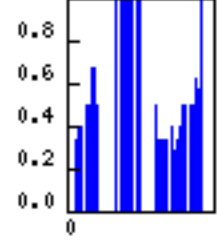

C.innitis specific/genes/50kb

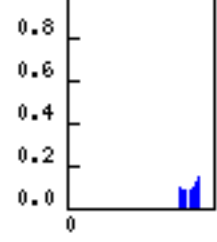

Cocci specific/genes/50kb

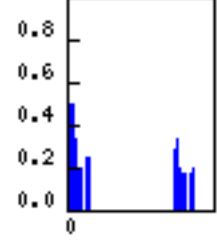

Supplement: Supplemental_Figure_17.pdf [file Supplemental_Figure_17.pdf]
