# Supplementary material for: Comparative genomic analyses of the human fungal pathogens Coccidioides and their relatives
Source: HighWire-hosted journal article supplement (doi:10.1101/gr.087551.108), 2009-08-28

Figure SI2: Whole genome syntenic alignments

Dotplots generated via the MUMMER software package illustrate homologous regions between two genome sequences. Dotted lines that intersect the axes represent contig boundaries. A) A NUCMER generated dot plot between the *C. immitis* (x-axis) and *C. posadasii* (y-axis) genomes. Only those *C. posadasii* contigs linked via the optical map were used in this analysis. B) A PROMER generated dot plot between the *C. immitis* (x-axis) and *U. reesii* (y-axis).

A

*Coccidioides posadasii* strain C735 assembly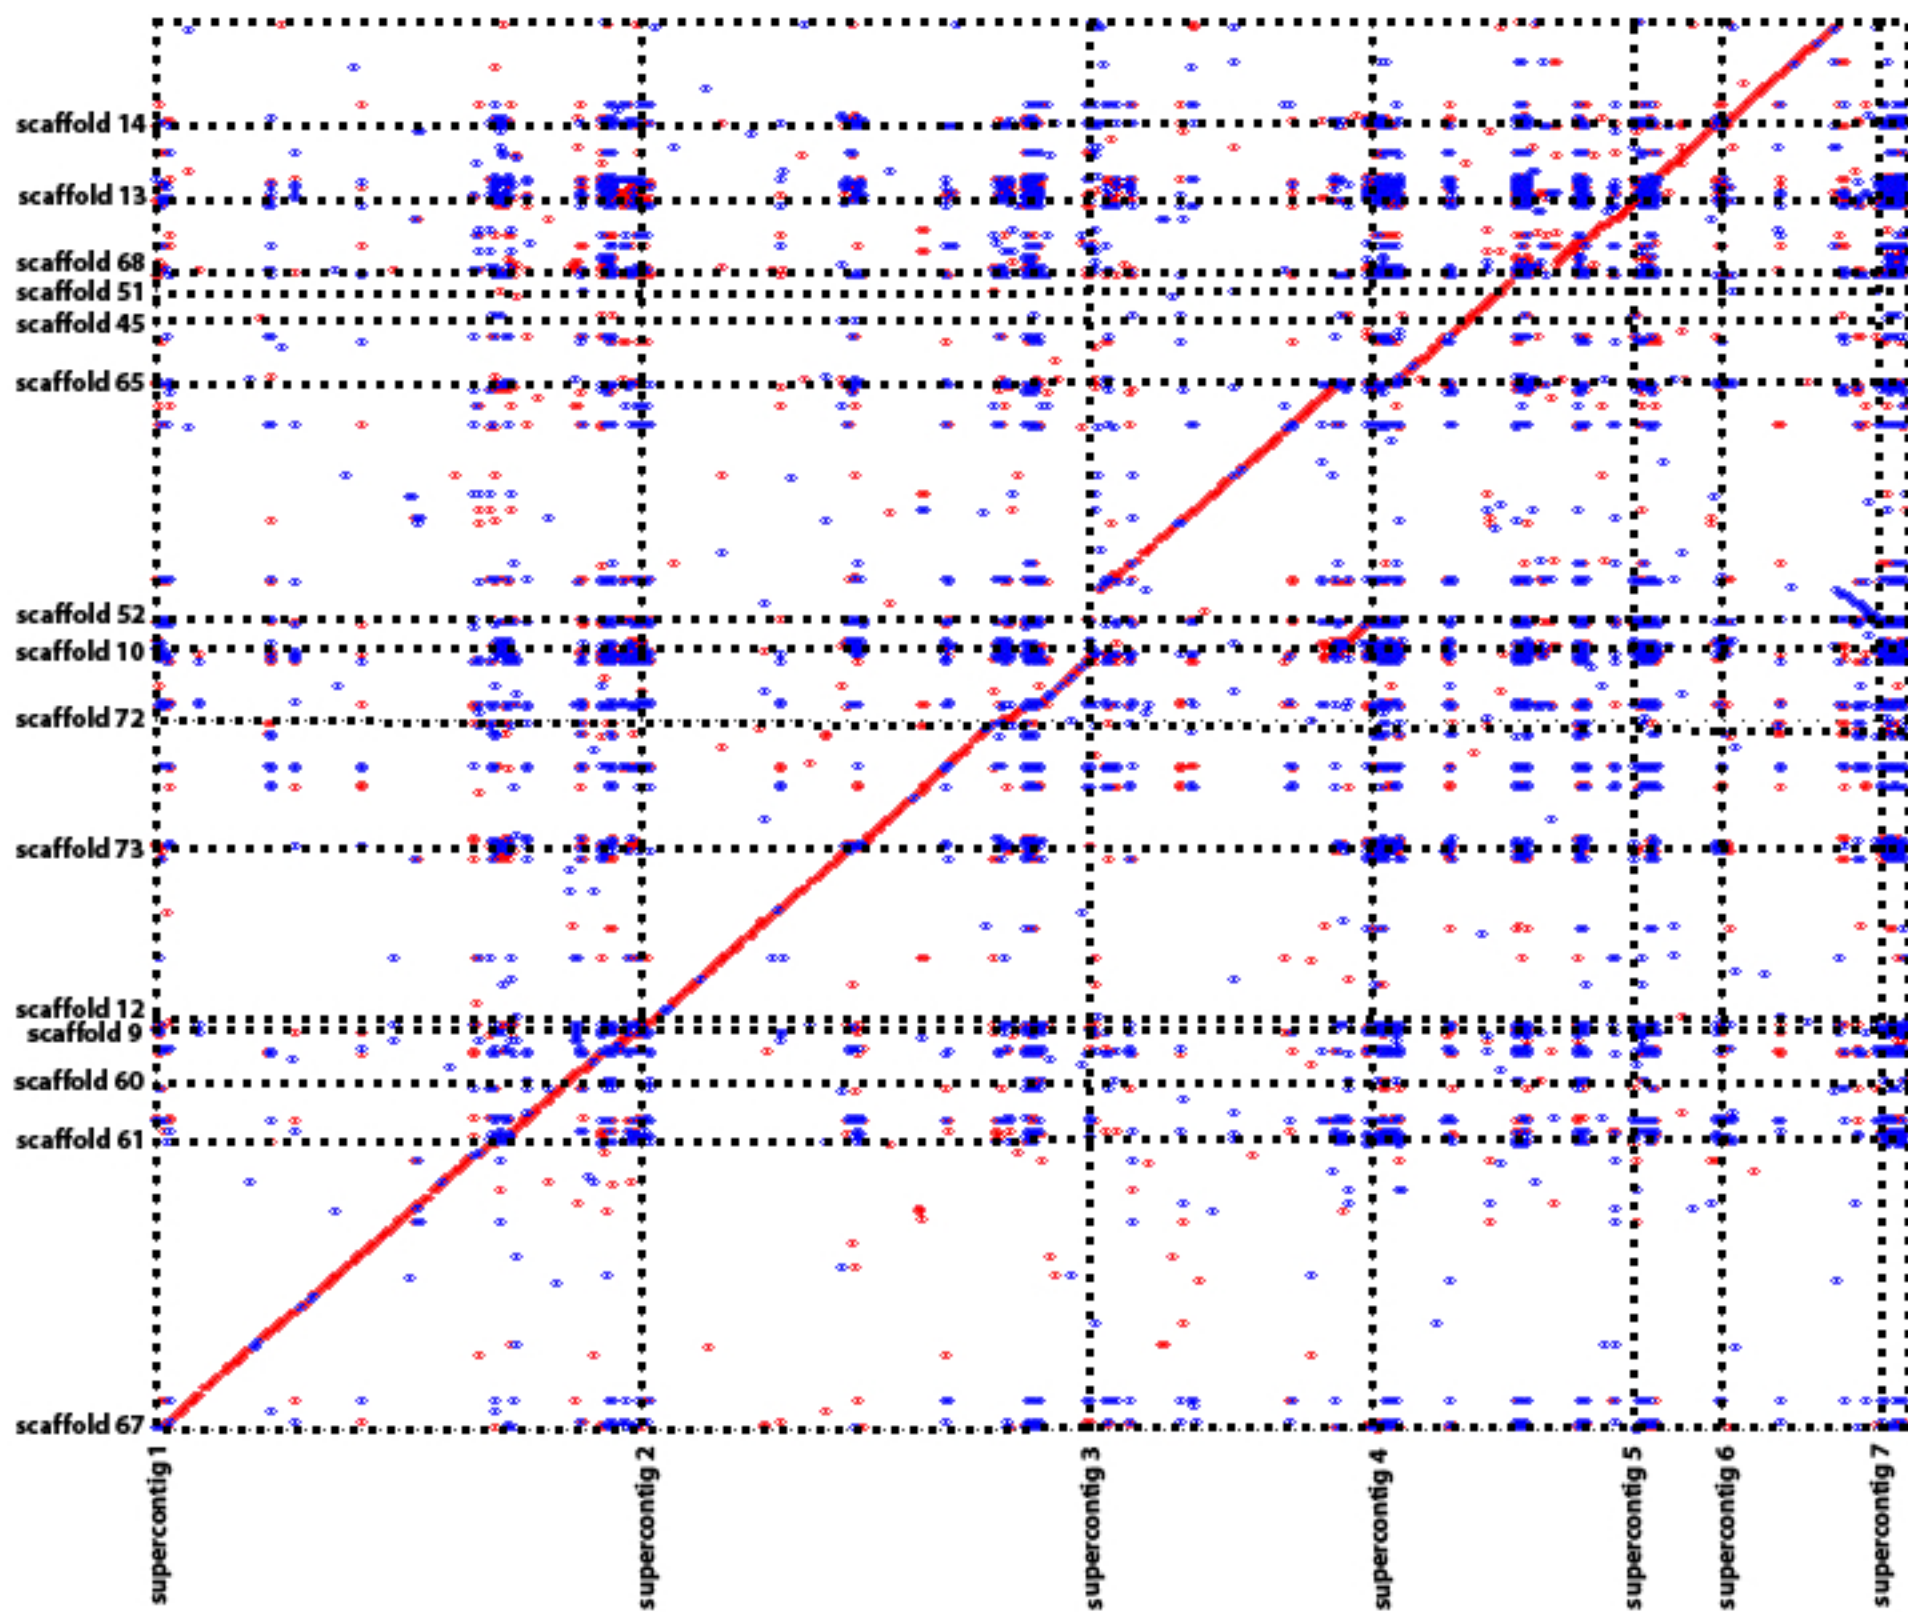*Coccidioides immitis* strain RS assembly

B

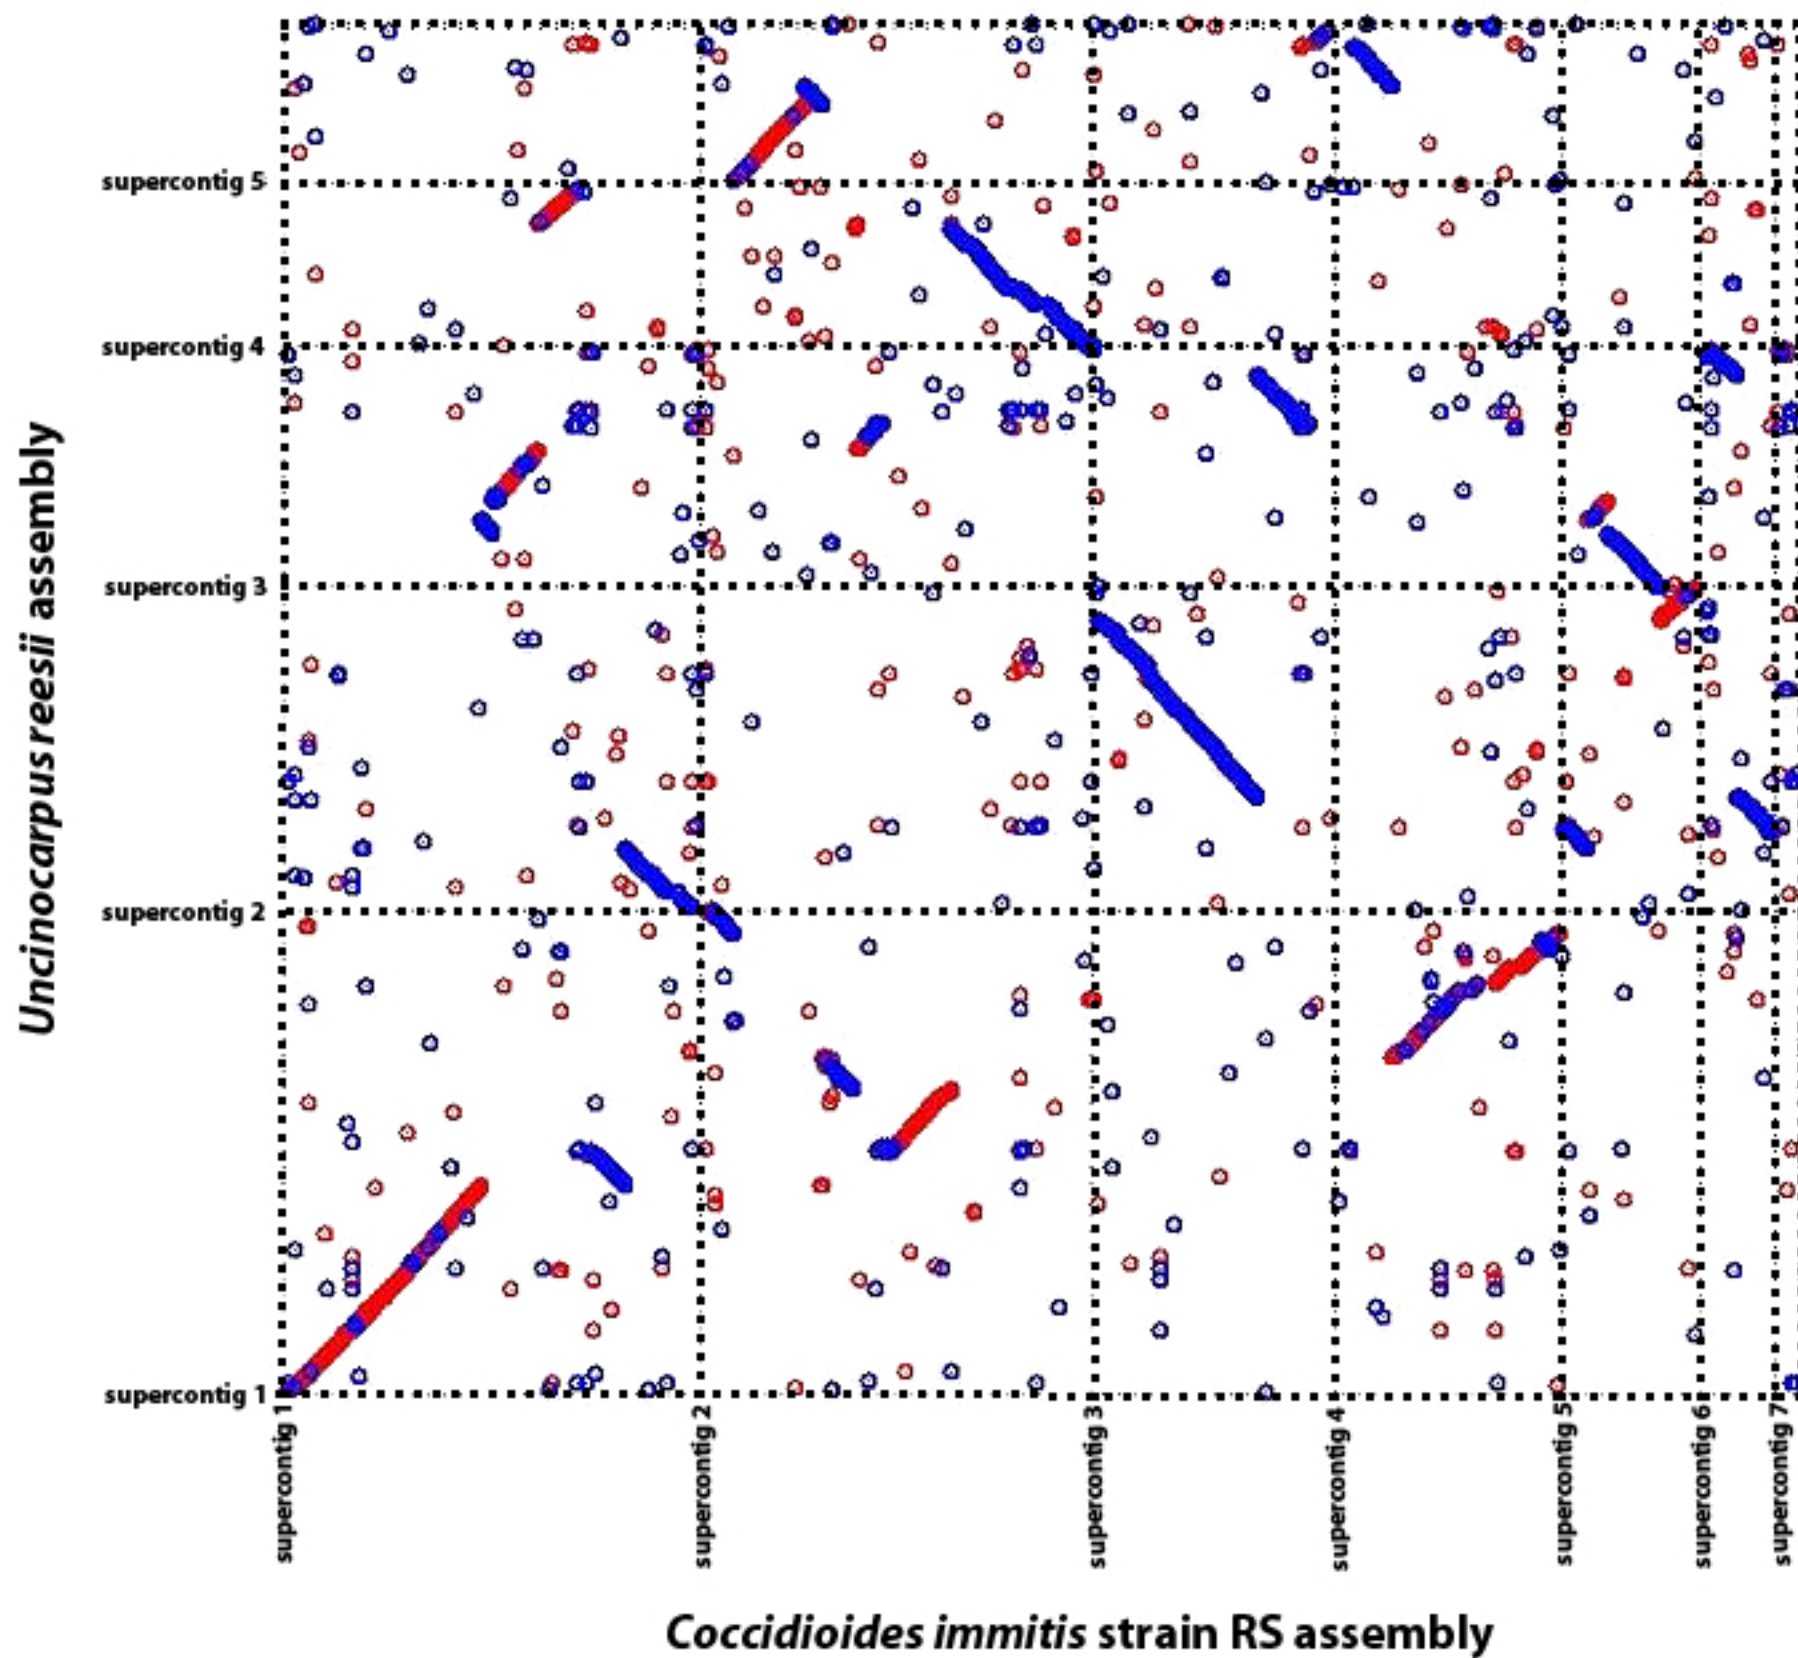

Supplement: Supplemental_Figure_2.pdf [file Supplemental_Figure_2.pdf]
