# Supplementary material for: Comparative genomic analyses of the human fungal pathogens Coccidioides and their relatives
Source: HighWire-hosted journal article supplement (doi:10.1101/gr.087551.108), 2009-08-28
Supplement: Supplemental_Figure_11.pdf [file Supplemental_Figure_11.pdf]

# Figure 5

Histogram of dS for all Pairwise Orthologs  
between *C.immitis* and *U.reesii*

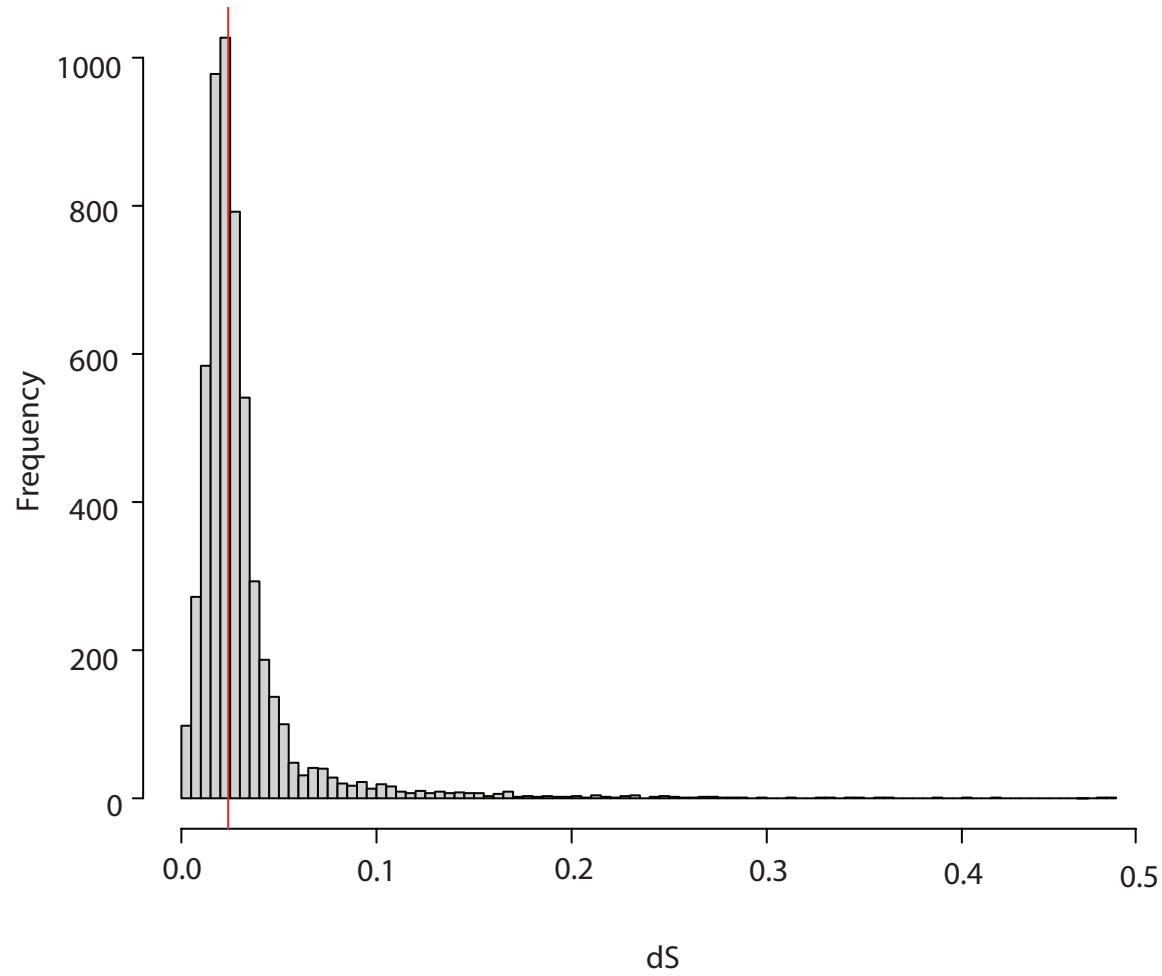

Histogram of dS for all Pairwise Orthologs  
between *C.immitis* and *U.reesii*

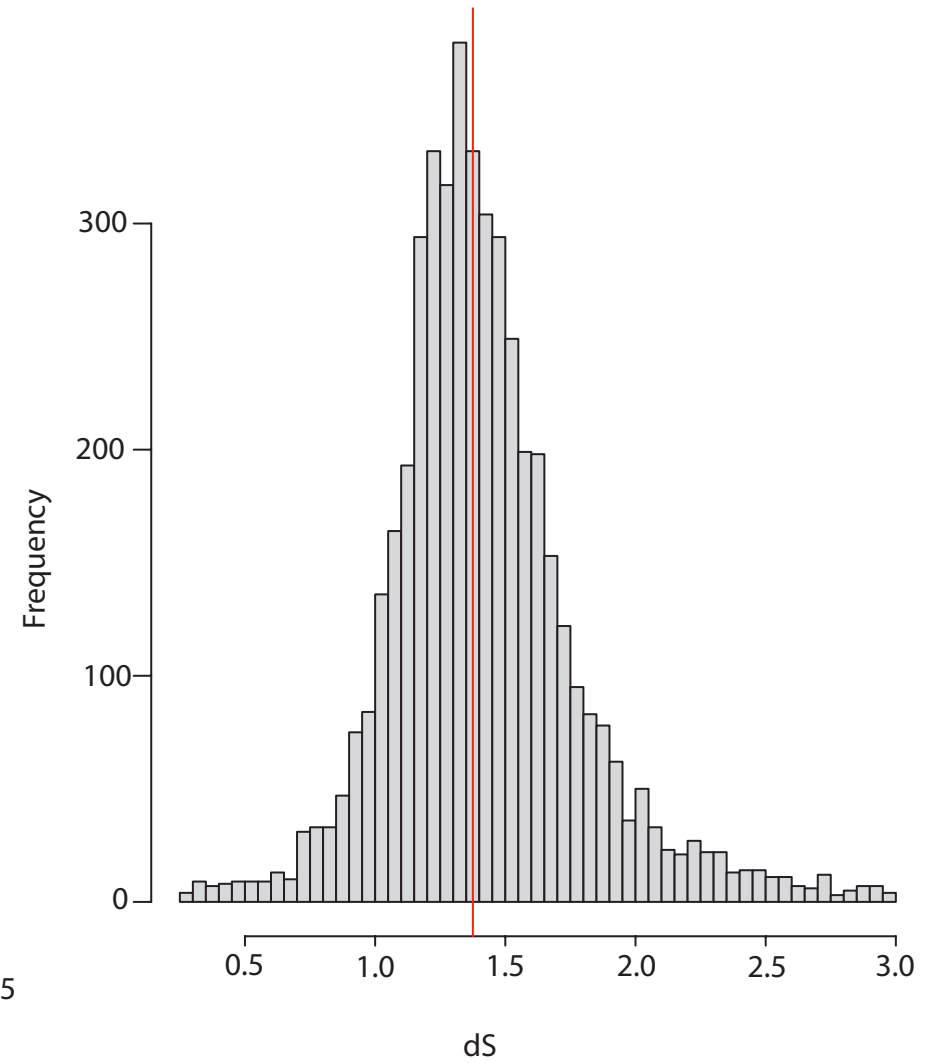

Neutral mutation rates of conserved *C. immitis*, *C. posadasii*, and *U. reesii* genes

Each histogram represents the synonymous substitution rate (dS) for each pair of orthologs shared between the two species in question. Median values are indicated via vertical red lines. A) A histogram of dS calculated from 5,820 orthologs conserved between *C. immitis* and *U. reesii*. The estimated median value (1.60) indicates that the taxa are too highly diverged to identify the selection profile via dN/dS analysis. B) A similar histogram calculated from 6,763 orthologs shared between *C. immitis* and *C. posadasii* (median = 0.023).
