# Supplementary material for: Comparative genomic analyses of the human fungal pathogens Coccidioides and their relatives
Source: HighWire-hosted journal article supplement (doi:10.1101/gr.087551.108), 2009-08-28
Supplement: Supplemental_Figure_13.pdf [file Supplemental_Figure_13.pdf]

Figure 6

Histogram of pairwise Ka/Ks between *C. immitis* and *C. posadasii*

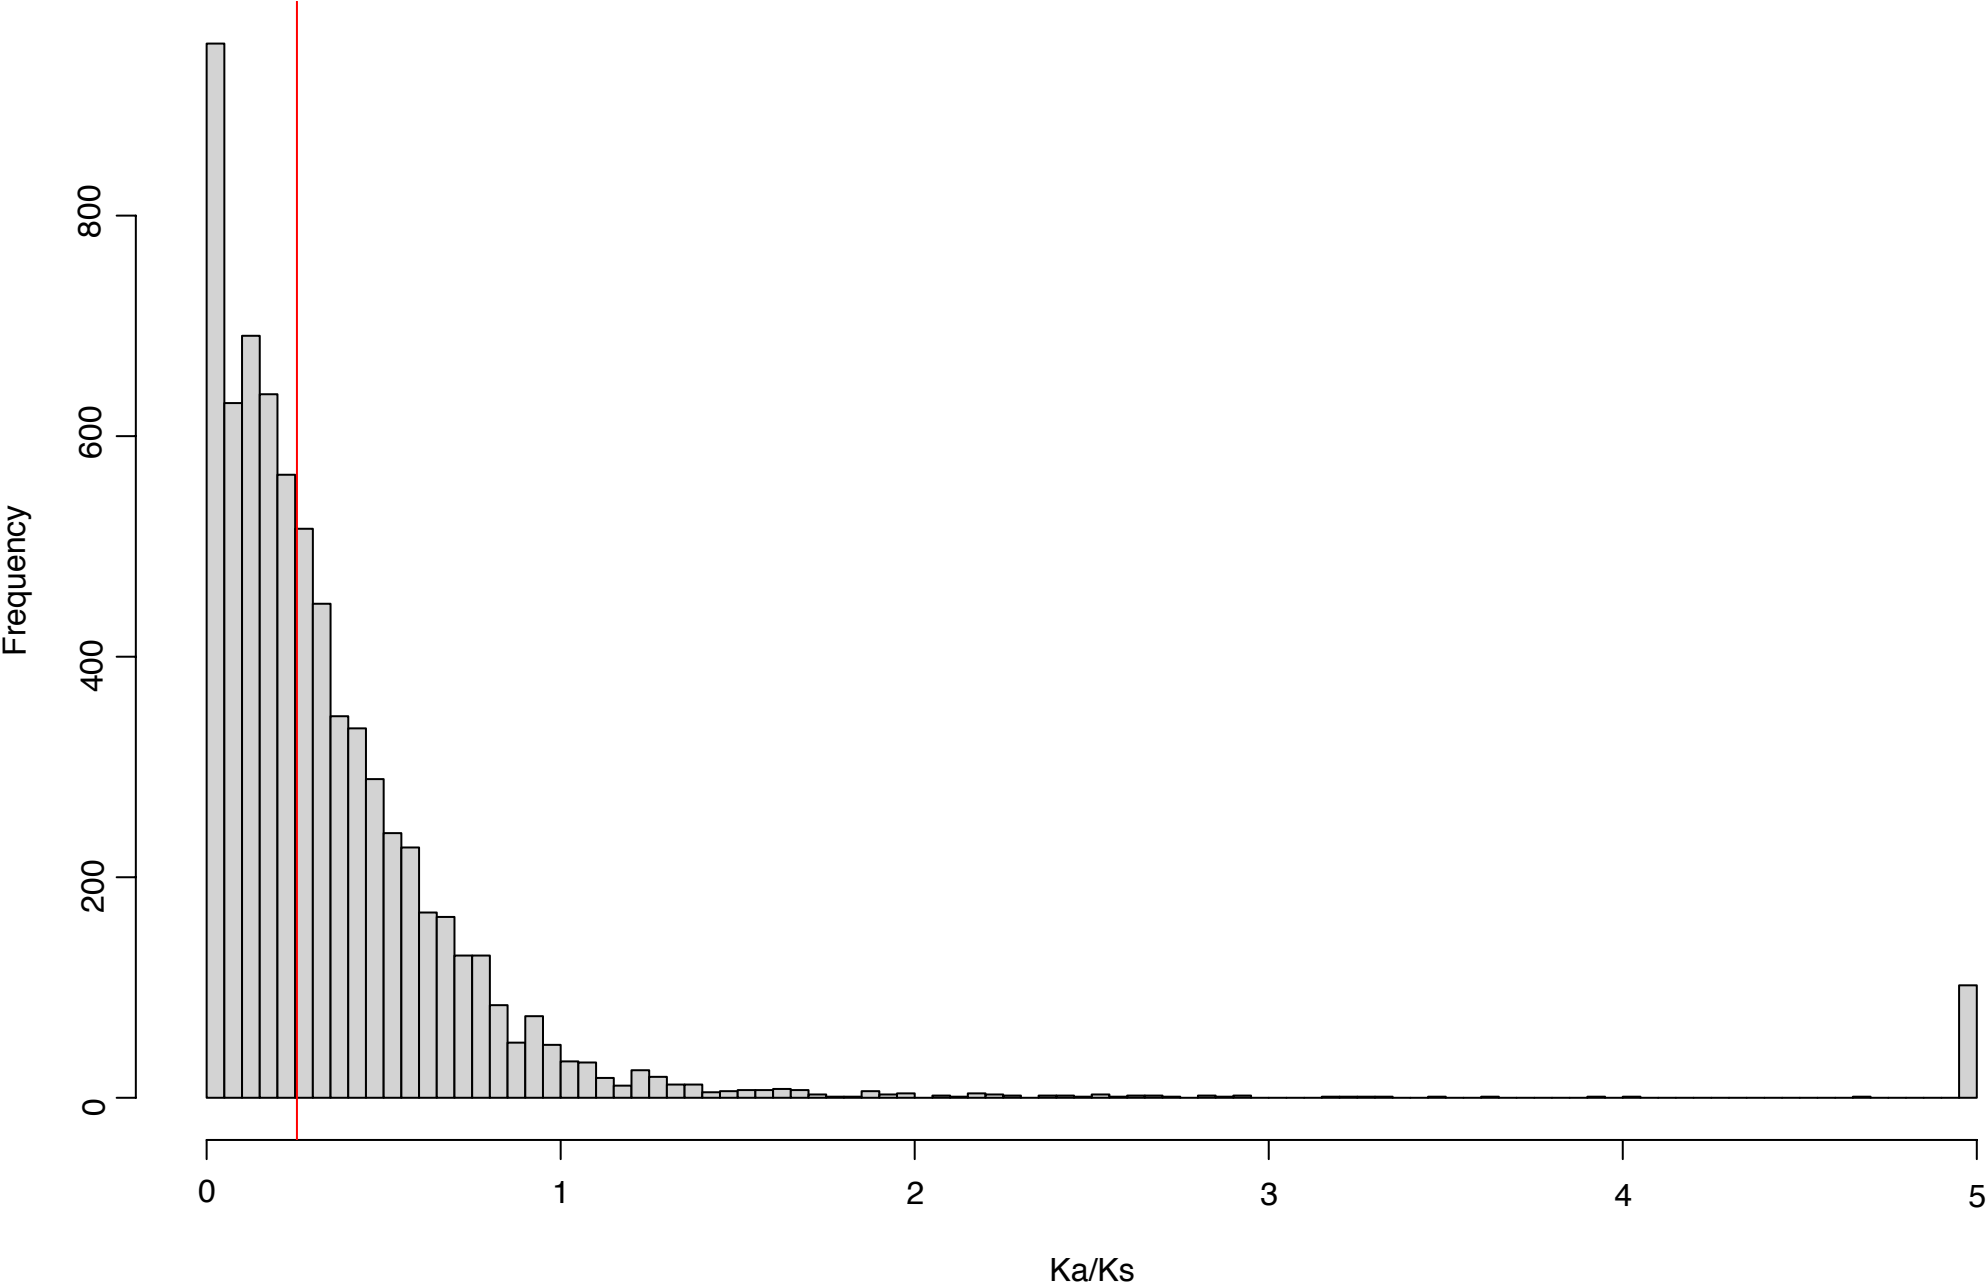

Distribution of dN/dS values for all pairwise orthologs between *C. immitis* and *C. posadasii*

Histograms illustrating the dN/dS value for each of the 6,763 pairwise orthologs conserved between the *C. immitis* and *C. posadasii* genomes. The median value of 0.25 is indicated with a vertical red line and suggests that most genes have evolved under purifying selection. The plot is bounded by dN/dS = 5, so all greater values are represented in the right hand most bin.
