# Supplementary material for: Comparative genomic analyses of the human fungal pathogens Coccidioides and their relatives
Source: HighWire-hosted journal article supplement (doi:10.1101/gr.087551.108), 2009-08-28
Supplement: Supplemental_Figure_18.pdf [file Supplemental_Figure_18.pdf]

### C. posadasii C735 EST libraries.

The mycelial (saprobic) phase of *Coccidioides posadasii* was grown in GYE liquid medium (1% glucose, 0.5% yeast extract) at 30°C for 5 days in a shaking incubator. The endospore-forming spherules (parasitic phase) were produced by growth in flasks containing defined Converse glucose-salts medium {Levine, 1961} at 39°C purged with 20%CO<sub>2</sub>/80% air for 144 h in a shaking incubator. Total RNA from mycelia and spherules was used to prepare cDNA libraries in the pExpress1 vector by ExpressGenomics, Inc. (Frederick, MD). Other spherule cDNA libraries were obtained from T. Kirkland. (Table X).

| Table X. EST libraries used for <i>C. posadasii</i> C735 genome annotation |                                          |                  |                                      |          |
|----------------------------------------------------------------------------|------------------------------------------|------------------|--------------------------------------|----------|
| Library description                                                        | Library provider                         | TIGR identifiers | GenBank Accessions                   | No. ESTs |
| Spherule cDNA library                                                      | T. Kirkland                              | CIA[ABC]%        | BF250924-BF252964                    | 2041     |
| Mycelia large-insert cDNA library                                          | M. Gardner/G. Cole/ExpressGenomics, Inc. | CIB[ABC]%        | CF811748-CF819661, CO014357-CO023596 | 17154    |
| Mycelia small-insert cDNA library                                          | M. Gardner/G. Cole/ExpressGenomics, Inc. | CID[ABC]%        | CF819662-CF827997, CO023597-CO024307 | 9047     |
| Spherule small-insert library                                              | M. Gardner/G. Cole/ExpressGenomics, Inc. | CIE[ABC]%        | CO001106-CO014356                    | 13251    |
| Spherule large-insert cDNA library                                         | M. Gardner/G. Cole/ExpressGenomics, Inc. | CIF[ABC]%        | CO024308-CO036056                    | 11749    |
| Spherule cDNA library                                                      | T. Kirkland                              | CIG[ABC]%        | BF252965-BF253375                    | 411      |
| Spherule cDNA library                                                      | See GenBank                              | N/A              | AF329641-AF329651                    | 11       |
| Total                                                                      |                                          |                  |                                      | 53664    |

Levine, H.B. (1961) Purification of the spherule-endospore phase of *Coccidioides immitis*. *Sabouraudia* **1**: 112-11
